# Supplementary material for: Second harmonic generation in Janus MoSSe a monolayer and stacked bulk with vertical asymmetry
Source: Royal Society of Chemistry journal article supplement (doi:10.1039/c9cp03395e), 2019-01-01
Supplement: c9cp03395e1.pdf [file c9cp03395e1.pdf]

## Second Harmonic Generation in Janus MoSSe Monolayer and Stacked Bulk with Vertical Asymmetry

Yadong Wei,<sup>a</sup> Xiaodong Xu,<sup>a</sup> Songsong Wang,<sup>a</sup> Weiqi Li,<sup>a\*</sup> and Yongyuan Jiang<sup>a,b,c,d,e\*</sup>

<sup>a</sup> Department of Physics, Harbin Institute of Technology, Harbin, China <sup>b</sup> Collaborative Innovation Center of Extreme Optics, Taiyuan, Shanxi, China <sup>c</sup> Key Lab of Micro-Optics and Photonic Technology of Heilongjiang Province, Harbin, China <sup>d</sup> Key Laboratory of Micro-Nano Optoelectronic Information System, Ministry of Industry and Information Technology, Harbin, China

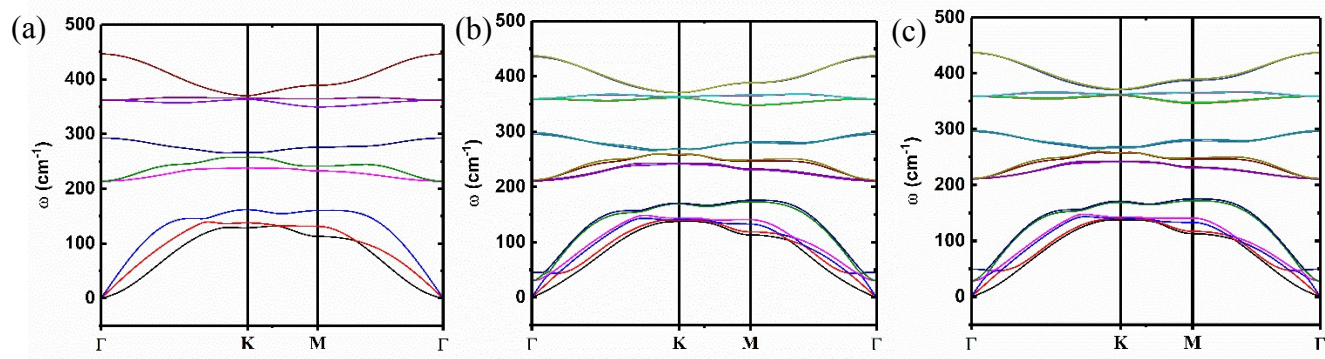

Figure S1 The Phonon Dispersion of bulk Janus MoSSe stacked patterns (a) AA, (b) AB, (c) AC

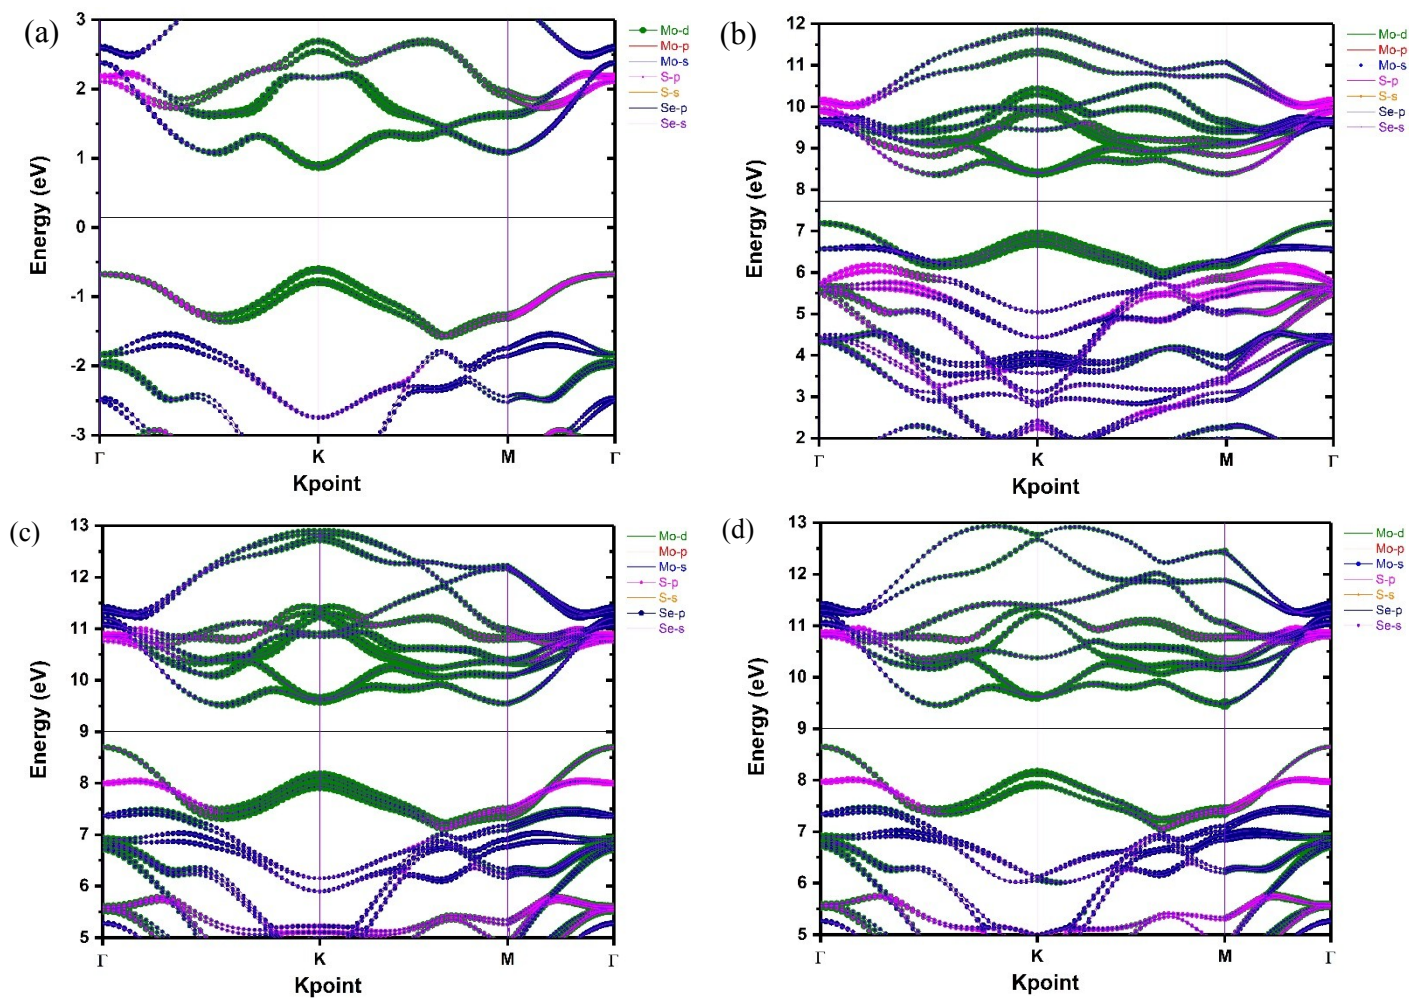

Figure S2. Projected band structures for (a) monolayer, (b) AA stack, (c) AB stack and (d) AC stack bulk Janus MoSSe. The Fermi energy for each system is labeled as the solid line across the K path

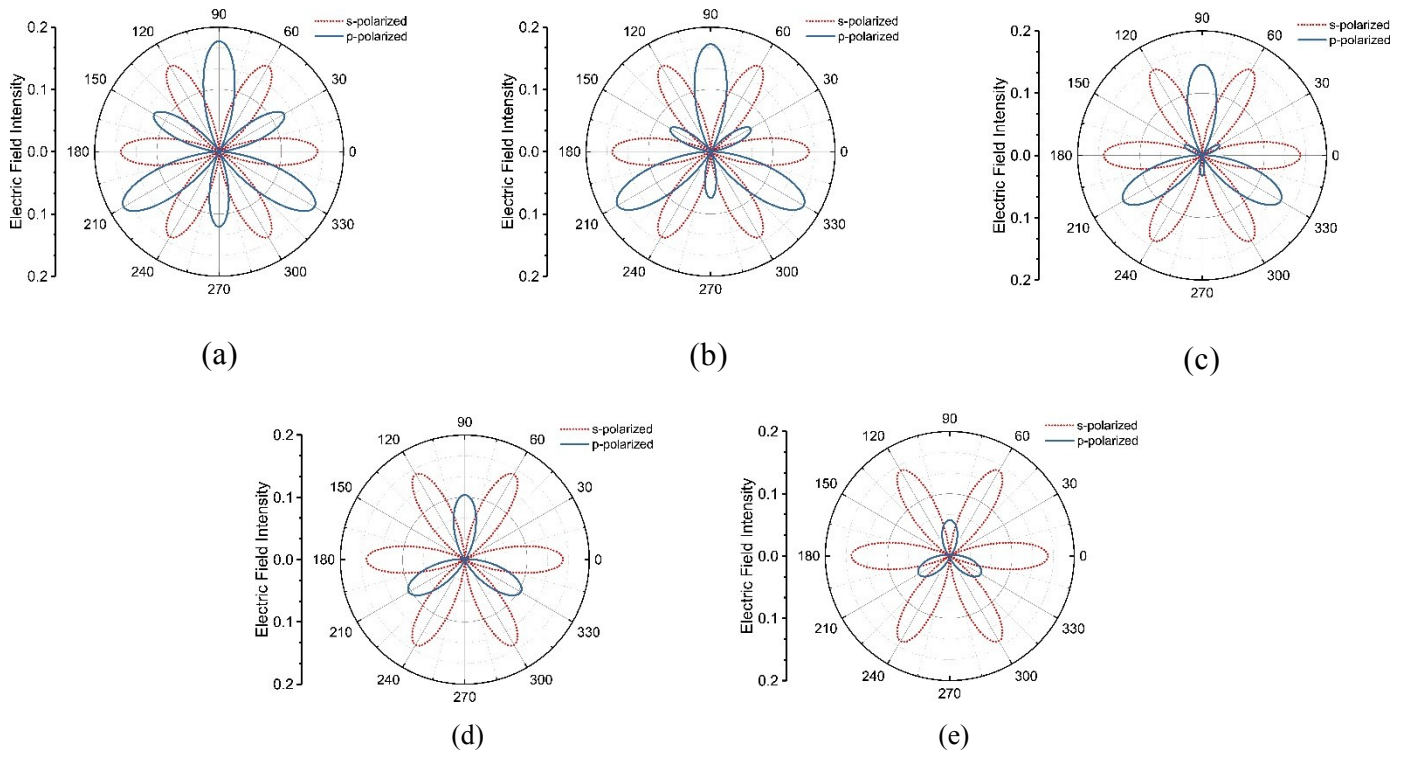

Figure S3. The polarization diagram for different incident angle (a) 15° (b) 30° (c) 45° (d) 60° and (e) 75° in the monolayer Janus MoSSe system

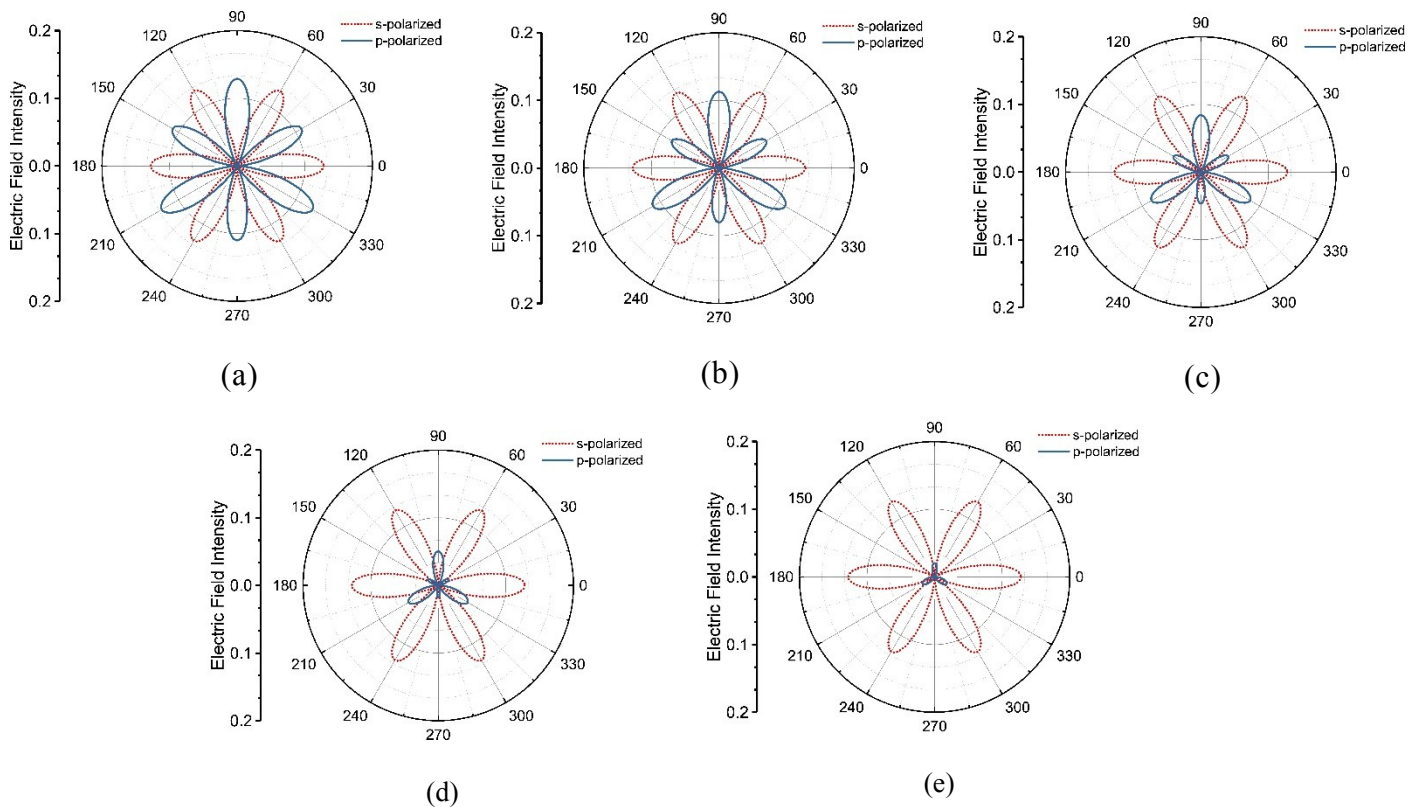

Figure S4. The polarization diagram for different incident angle (a) 15° (b) 30° (c) 45° (d) 60° and (e) 75° in the AA stacked bulk Janus MoSSe system

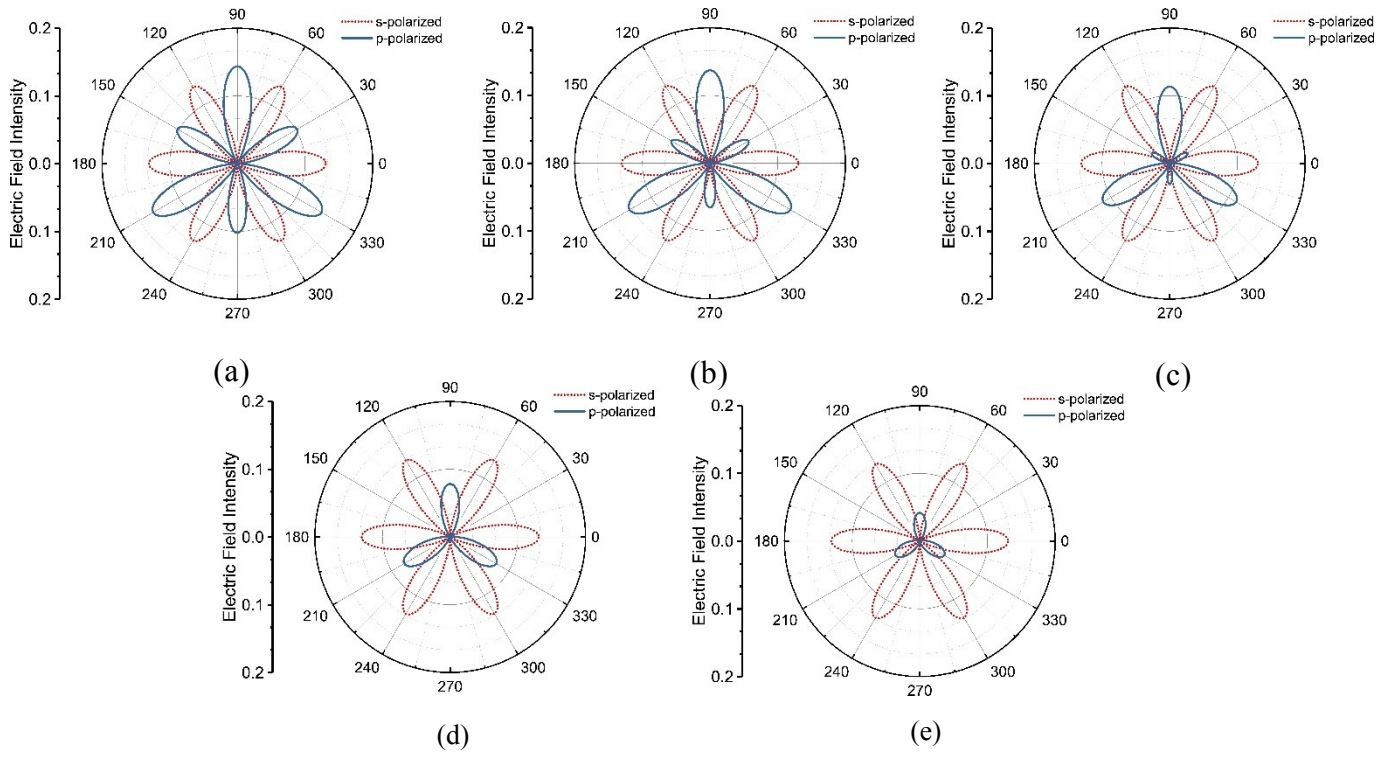

Fig. S5. The polarization diagram for different incident angle (a)  $15^\circ$  (b)  $30^\circ$  (c)  $45^\circ$  (d)  $60^\circ$  and (e)  $75^\circ$  in the AB stacked bulk Janus MoSSe system
